# Supplementary material
Source: MDPI journal article supplement (https://www.mdpi.com/2073-4395/11/11/2191)
Supplement: s1 [file s1]

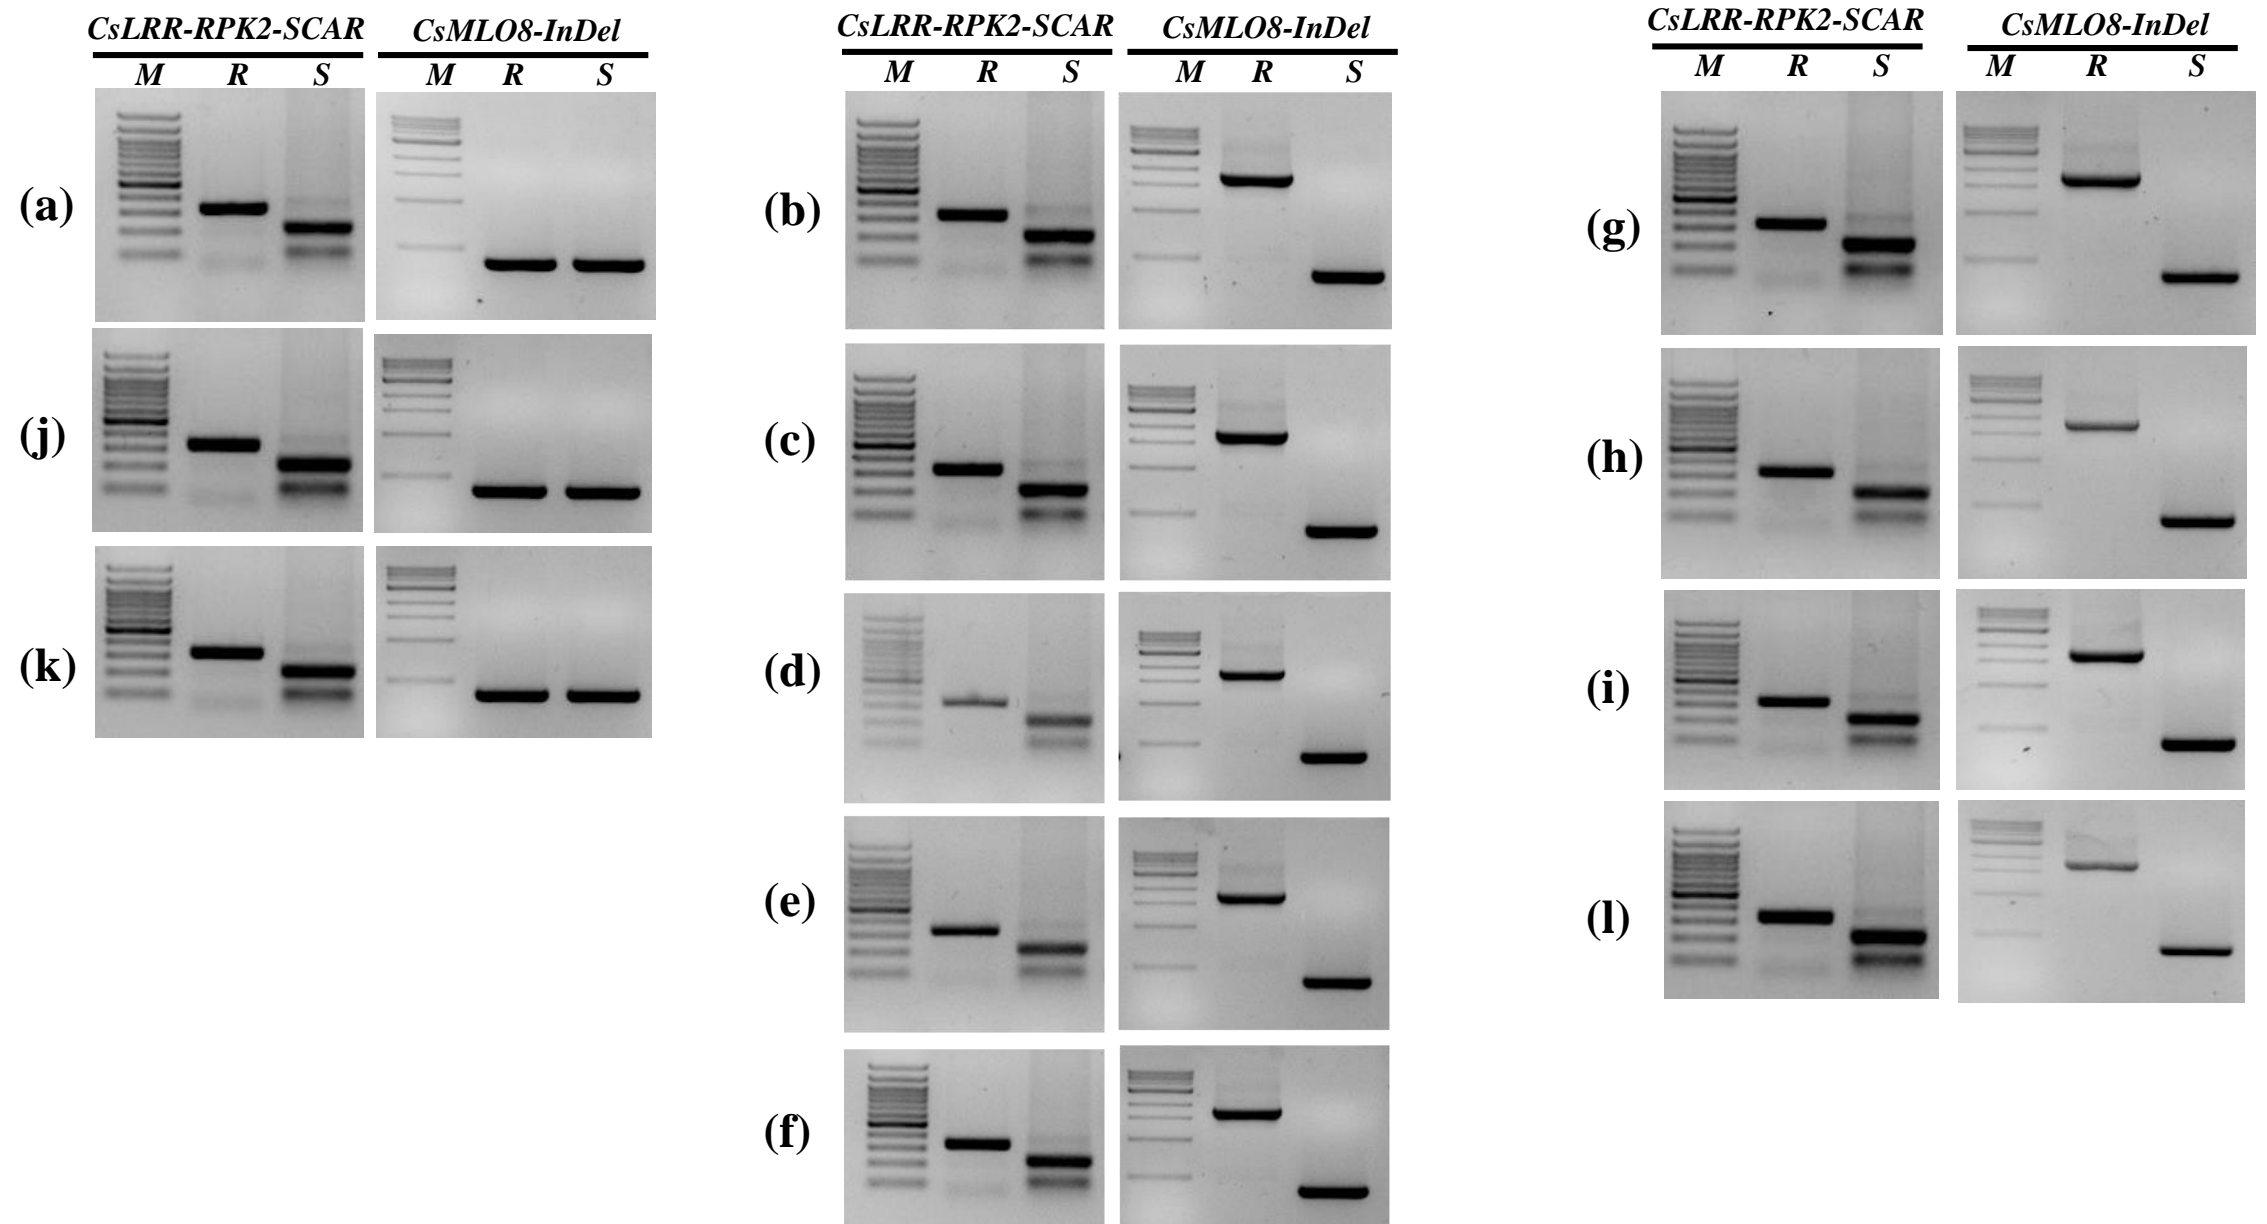

**Supplementary Figure S1.** *CsLRR-RPK2-CAPS* and *CsaMLO8-InDel* markers-based genotyping analysis results. (a) ~ (l) represent the different types of PM-resistance sources shown in Table 1. M, R and S represent the molecular marker, the PM-resistance and susceptible parental lines of each crossing combination, respectively.
